# Supplementary material
Source: Royal Society of Chemistry journal article supplement (doi:10.1039/d5bm01004g)
Supplement: d5bm01004g2.pdf [file d5bm01004g2.pdf]

Supplementary information for:

## Self-Sustaining Media-Reconstituted GelMA Bioink Supports Printable Hematopoietic Cultures

Noah S. Pereira<sup>1,2</sup>, Jacob Quint<sup>2</sup>, Evelyn Mollocana-Lara<sup>2</sup>, Mohamadmahdi Samandari<sup>2</sup>, Farnoosh SaeediNejad<sup>2</sup>,  
Mikaela Kutrolli<sup>2</sup>, Cooper Cassells<sup>1</sup>, Erin McEwen<sup>1</sup>, Bernd Simon<sup>3</sup>, Ali Tamayol<sup>2\*</sup>, Vanessa Scanlon<sup>1\*</sup>

1: Center of Regenerative Medicine and Skeletal Biology, University of Connecticut Health Center, Farmington CT

2: Department of Biomedical Engineering, School of Dental Medicine, University of Connecticut Health Center, Farmington CT

3: Molecular Biology and Biophysics, University of Connecticut Health Center, Farmington, CT

\*: Corresponding Authors: [atamayol@uchc.edu](mailto:atamayol@uchc.edu); [scanlon@uchc.edu](mailto:scanlon@uchc.edu)

**Table S1: MegaCult™-collagen formulation per mL**

| Media Mix     | Cells in IMDM | Collagen Solution |
|---------------|---------------|-------------------|
| 559.5 $\mu$ L | 49 $\mu$ L    | 391.5 $\mu$ L     |

**Table S2: Power Law equation variables of consistency index (K) and flow index (n) from viscosity vs. shear rate in different hydrogel concentrations.**

| Condition | °C | K value | N value | R <sup>2</sup> coefficient |
|-----------|----|---------|---------|----------------------------|
| Collagen  | 37 | 0.253   | -0.581  | 0.8392                     |
| 2.5% H    | 15 | 7.648   | -0.854  | 0.8111                     |
| 3% H      | 19 | 16.406  | -0.879  | 0.9464                     |

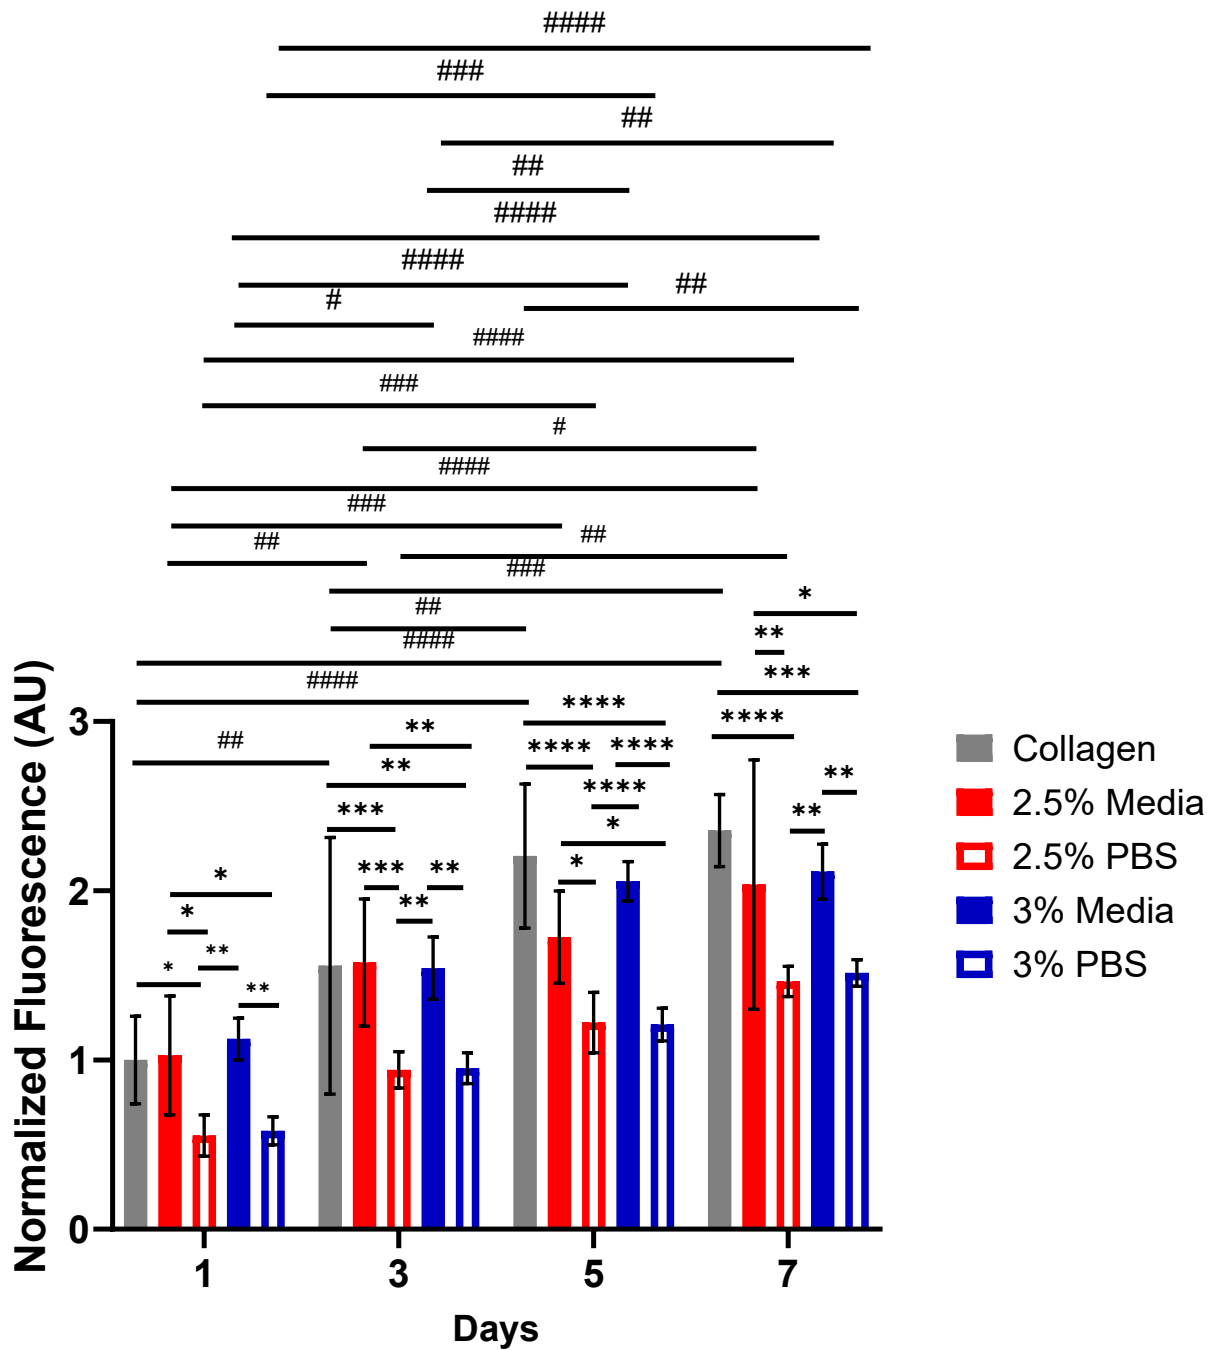

Figure S1: PrestoBlue analysis comparing reconstitution medium across a seven-day period, normalized to collagen day 1. \* represents comparisons between groups in a single day, # represents comparisons between the same group across multiple days. Combined of Figure 1B.

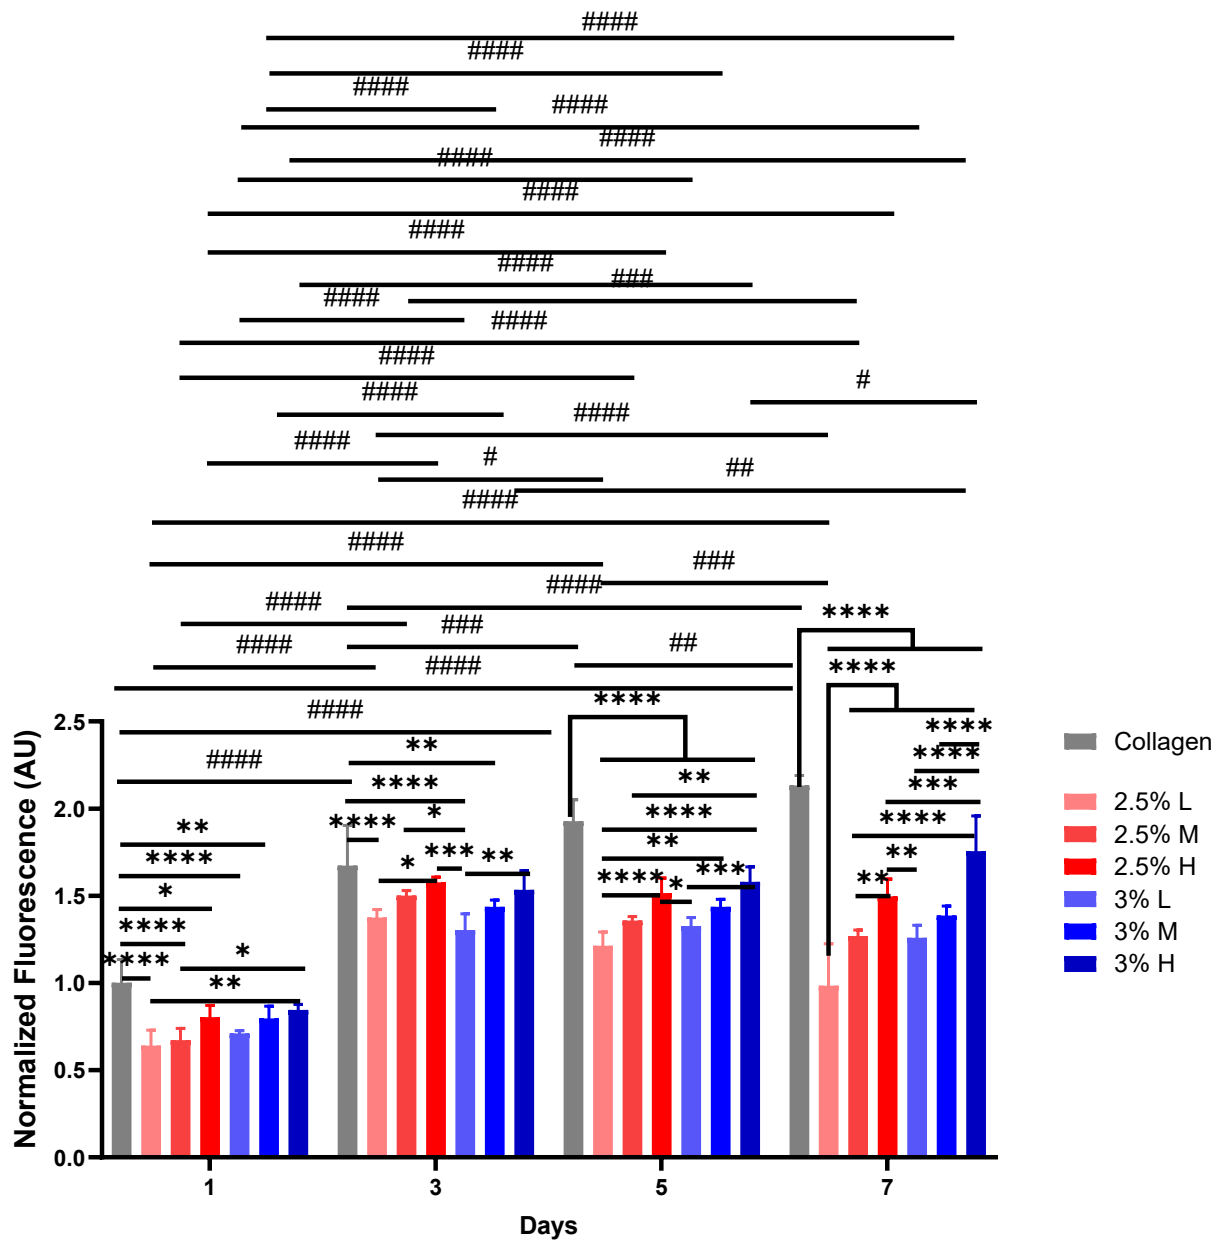

Figure S2: PrestoBlue analysis comparing degree of methacrylation across a seven-day period, normalized to collagen day one. \* represents comparisons between groups in a single day, # represents comparisons between the same group across multiple days. Combined of Figure 1C

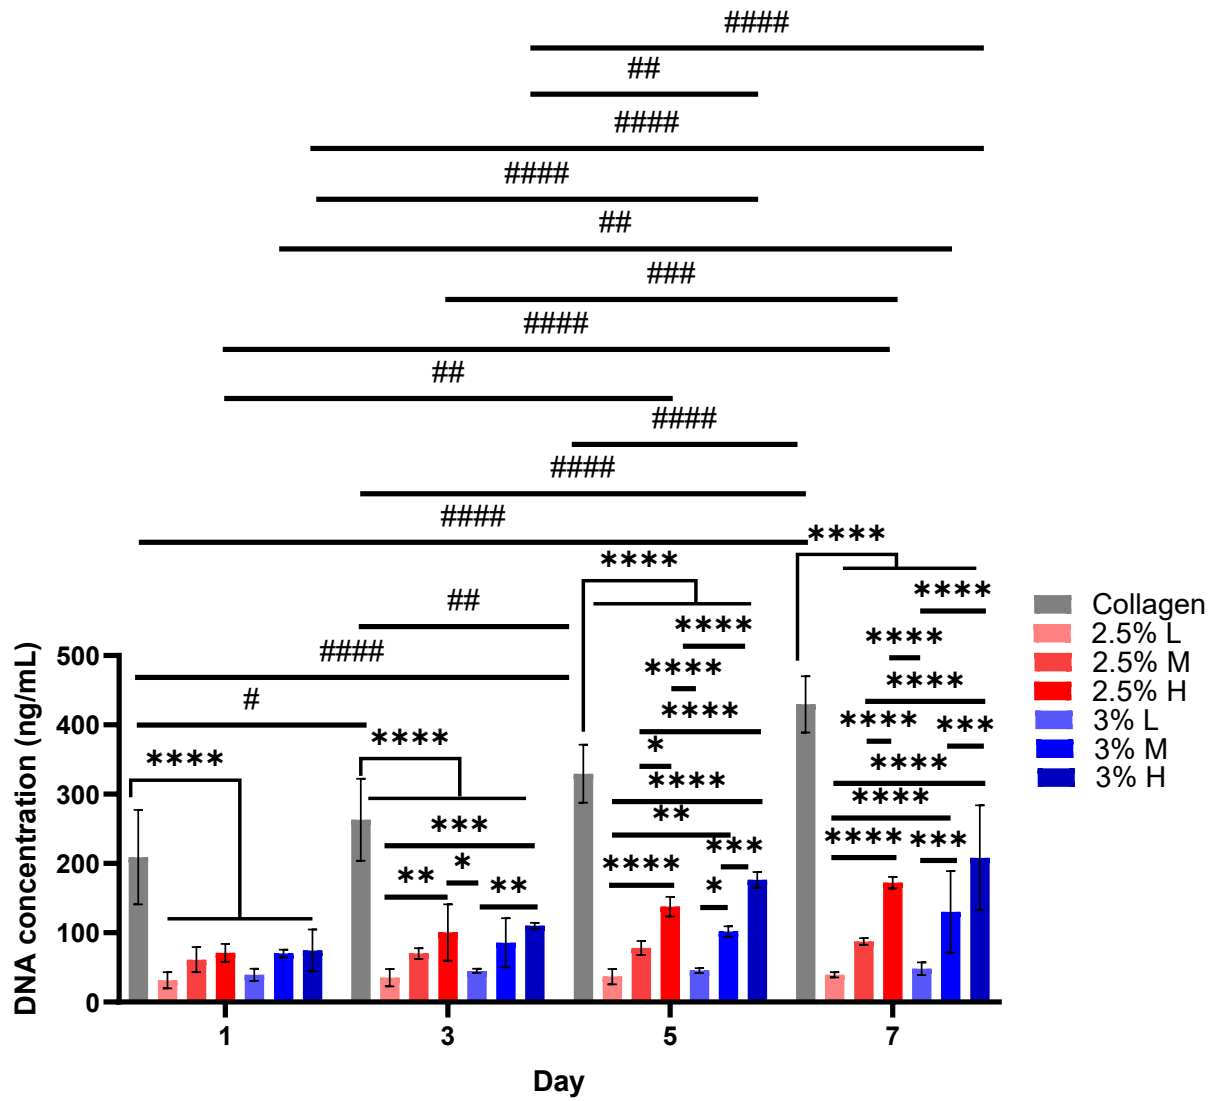

Figure S3: PicoGreen DNA quantification across the methacrylation groups over seven days., \* represents comparisons between groups in a single day, # represents comparisons between the same group across multiple days. Combined of Figure 1D

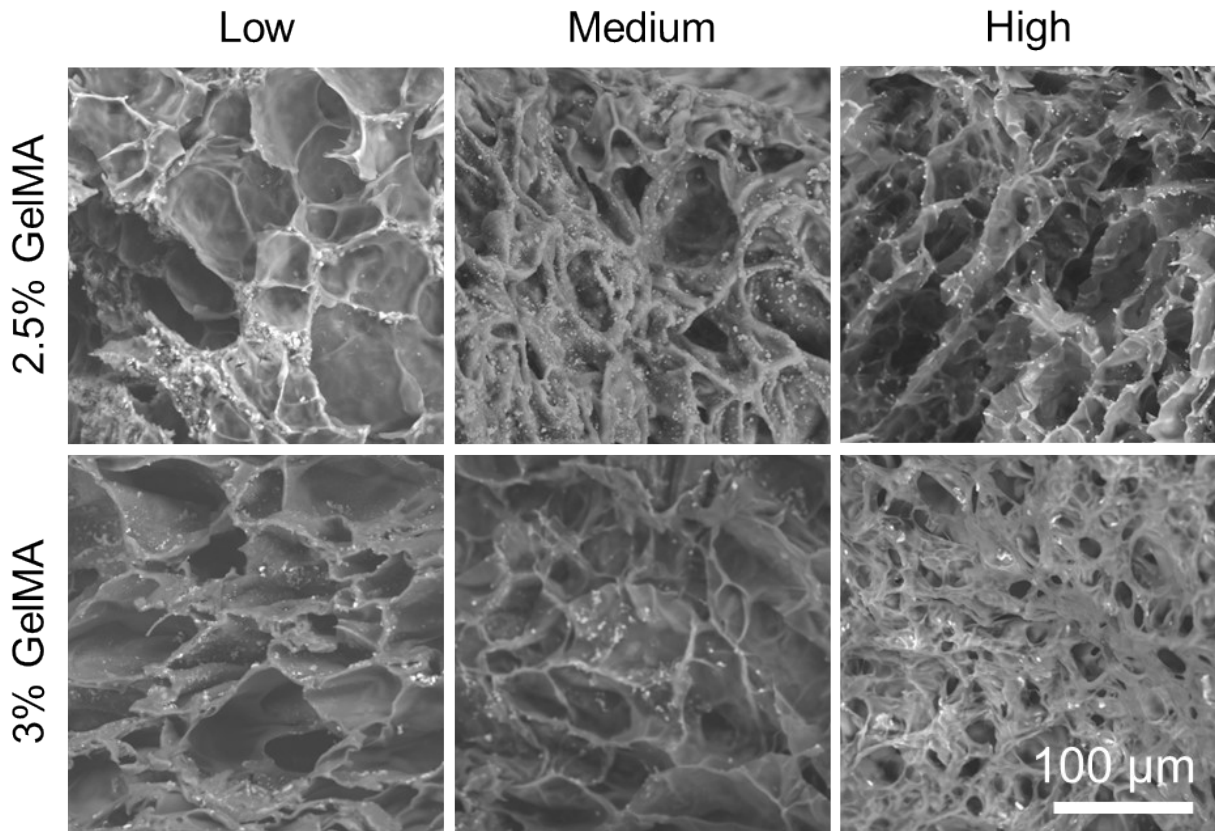

Figure S4: representative SEM analysis of GelMA constructs reconstituted in DPBS.

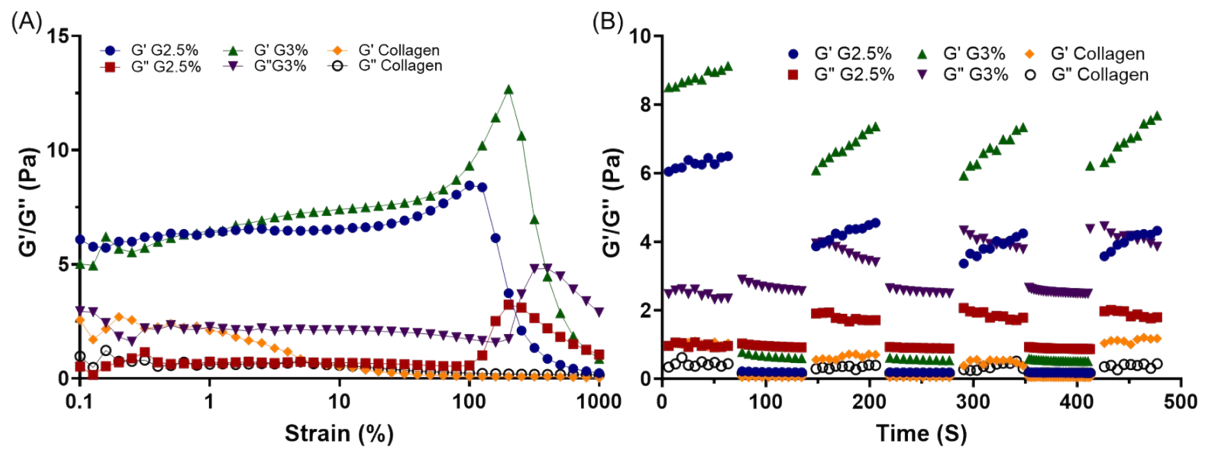

Figure S5 (A) Strain sweep of 2.5-3% w/v high methacrylated GelMA from 0.1-1000% strain. 1Hz (B) Shear recovery of 2.5%/3% high methacrylated GelMA alternating between one min periods of 1% and 1000% strain at a frequency of 1 Hz
