# Supplementary material
Source: Royal Society of Chemistry journal article supplement (doi:10.1039/d5bm01004g)

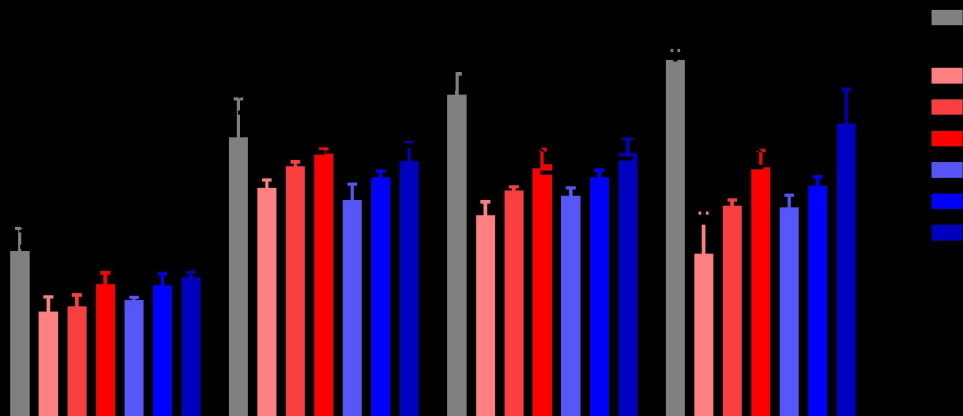

Supplement: d5bm01004g4.pdf [file d5bm01004g4.pdf]

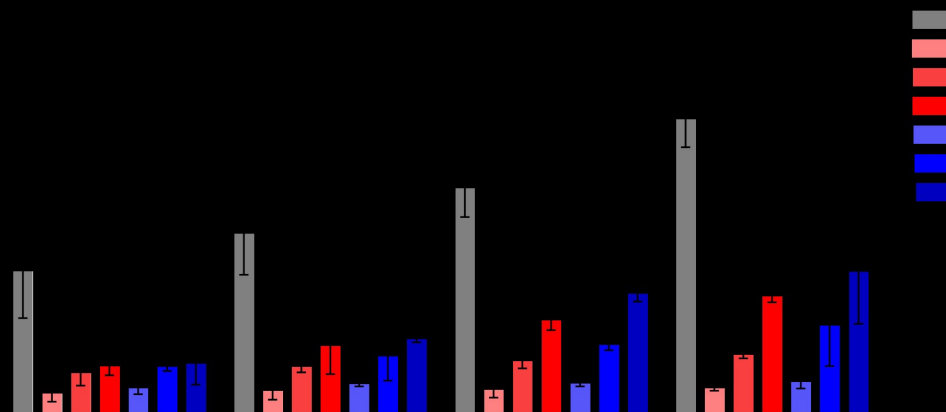

Supplement: d5bm01004g5.pdf [file d5bm01004g5.pdf]

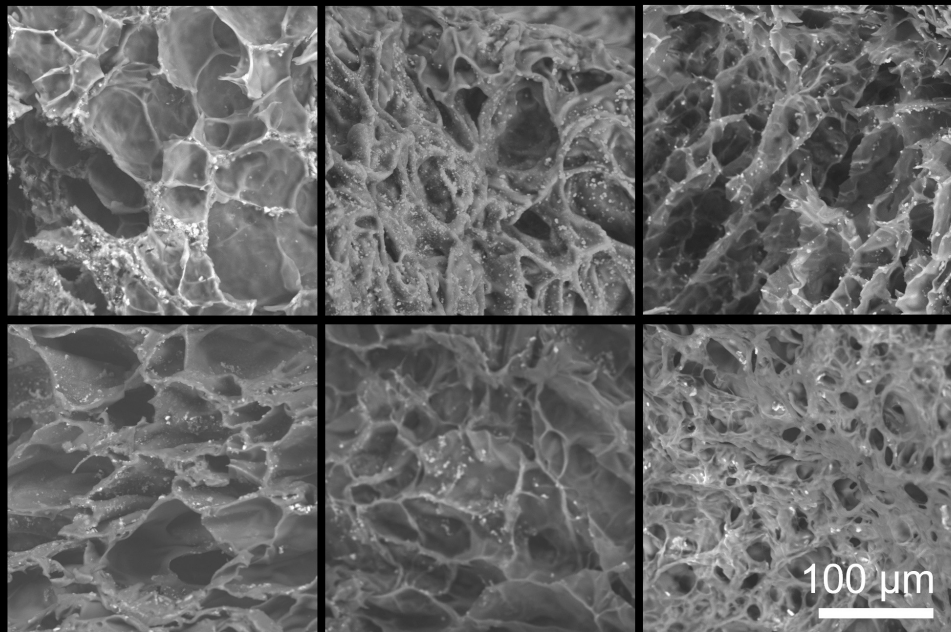

Supplement: d5bm01004g6.pdf [file d5bm01004g6.pdf]
